# Supplementary material for: Phase 1 clinical trial evaluating safety, exposure and pharmacodynamics of BTK inhibitor tolebrutinib (PRN2246, SAR442168)
Source: PubMed Central journal article supplement — Clin Transl Sci. 2021 Nov 12;15(2):442–50. doi: 10.1111/cts.13162 (PMC8841436; doi:10.1111/cts.13162), 2021-11-12

Numbers of CD3+, CD4+ and CD8+ T cells, CD19+ CD27- naïve B cells and CD19+ CD27+ memory B cells were analyzed by flow cytometry in whole blood samples drawn pre-dose on days 1, 4, and 10 in Part B only.

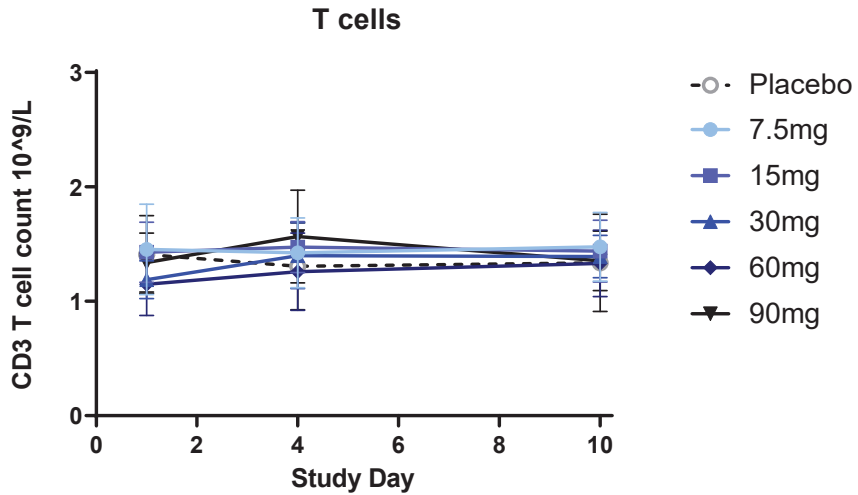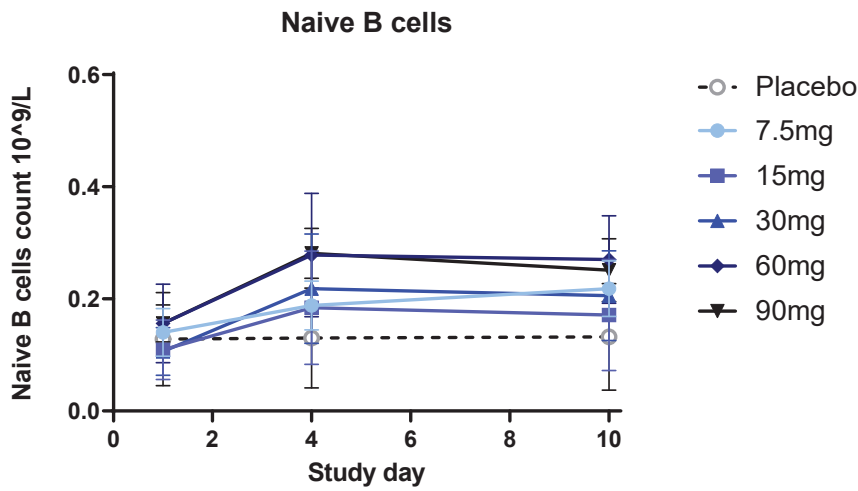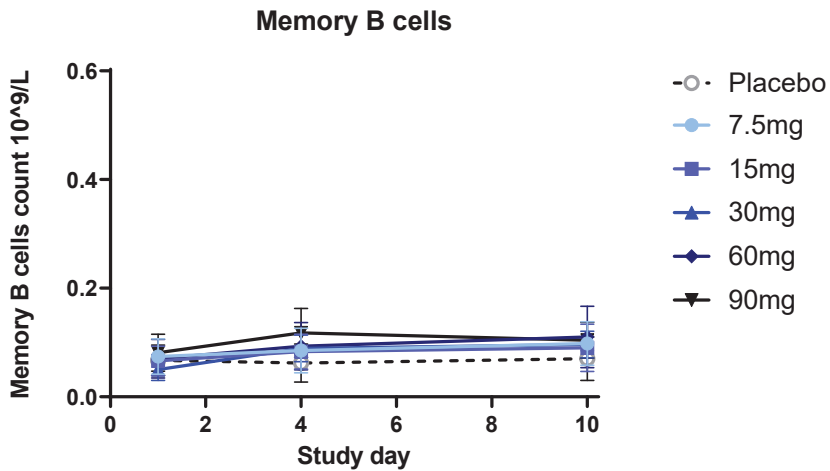

Supplement: CTS-15-442-s001.pdf [file CTS-15-442-s001.pdf]
